# Supplementary material
Source: Springer Nature journal article supplement (https://www.springermedizin.de/resource/supplementary/12889_2013_5978_MOESM1_ESM.pdf/9494014)

# REPUBLIC OF CAMEROON

0 100 200 km

## SE Baseline villages

- Province boundary
- Capital
- Approximative Pipeline Route
- Belabo Fixed Facilities Sites
- Goyoum Control Villages
- Belel Truck Stops
- Altitude over 900 m

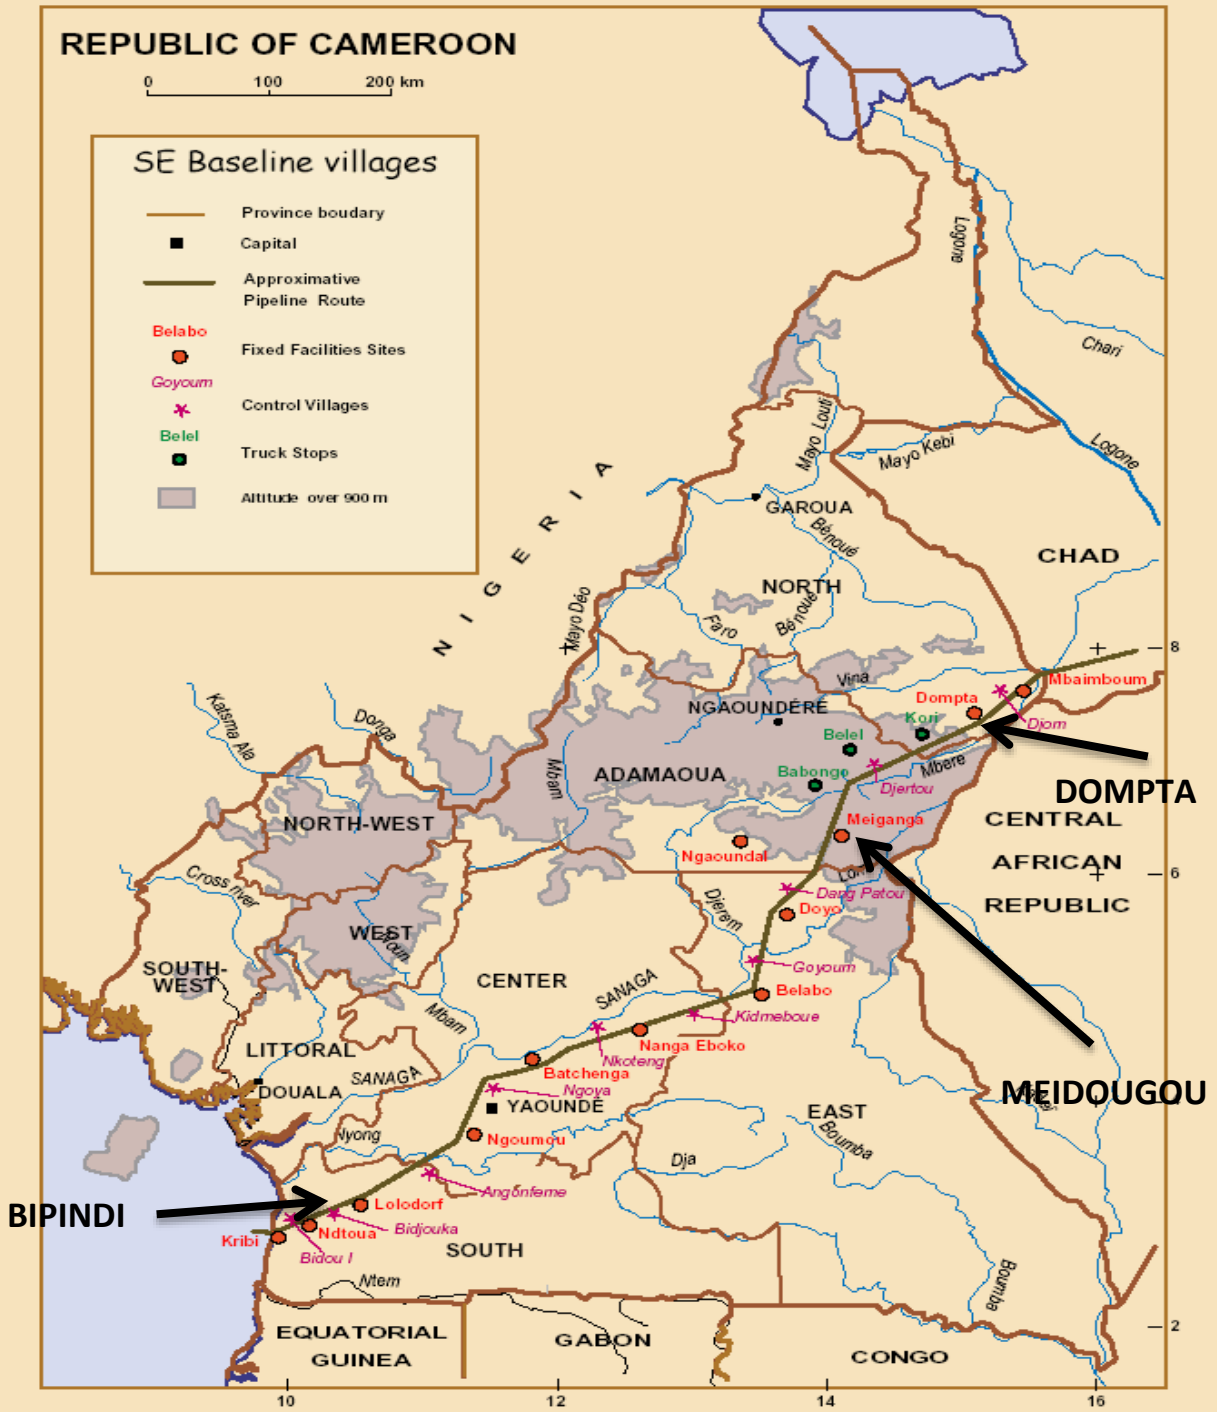

Supplement: MOESM1 [file 9494014]
